# Supplementary material for: A Cross-Sectional Study of Potential Antimicrobial Resistance and Ecology in Gastrointestinal and Oral Microbial Communities of Young Normoweight Pakistani Individuals
Source: MDPI journal article supplement (doi:10.3390/microorganisms11020279), 2023-01-20
Supplement: s1 [file s1]

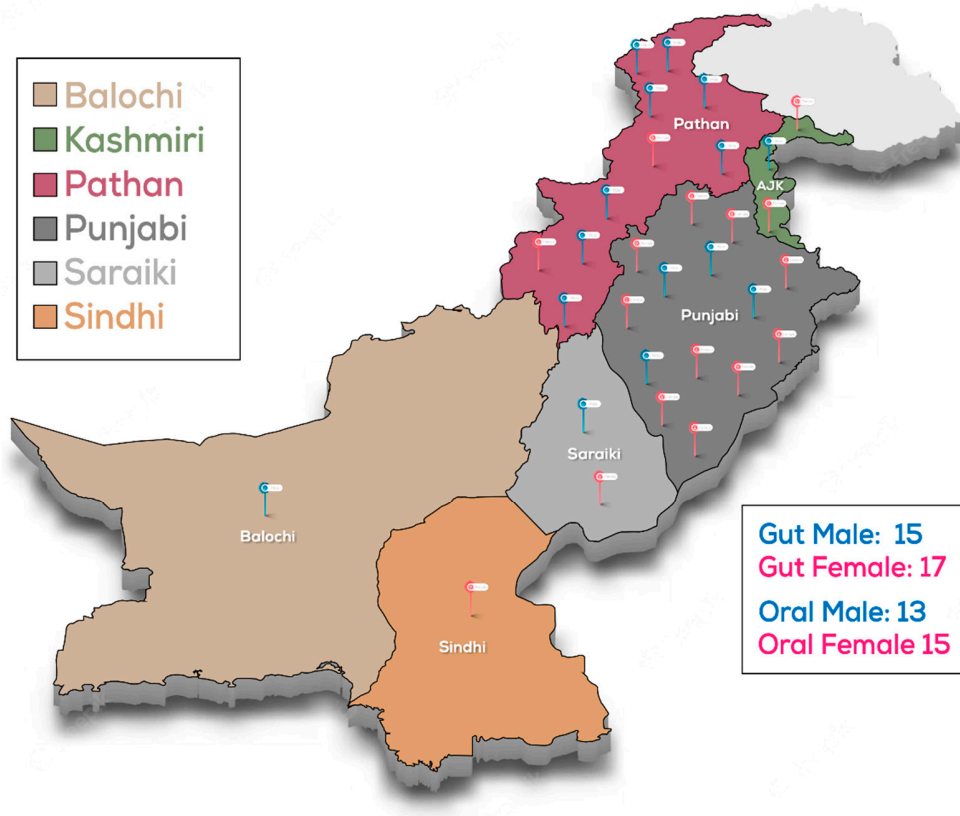

**Supplementary Figure S1. Map highlighting the Ethnicities of participants:** Self-reported ethnicities of healthy individuals at the time of sample collection, which is primarily based on their place of birth (highlighted on the map). The majority of these samples were paired as the individuals provided both gut and oral samples.

**Supplementary Table S1. Summary statistics of the samples analyzed.** A total of 60 samples were assigned to four major groups: Gut Male, Gut Female, Oral Male and Oral Female. Summary statistics, including median and Interquartile Range (IQR) of continuous variables such as *Age* and *BMI*, is given.

|   | Groups     | Total Samples (n) | Ethnic Groups (n)                                             | Age (Years)<br>18-40 |                 | BMI (Kg/m2)<br>18-25 |                 | Smoking<br>(n) |    | Antibiotics<br>Usage (Past 3<br>months) (n) |    | Fresh Fruits (n) |    | Junk food (n) |    | Sources of<br>drinking<br>water (n)                           |
|---|------------|-------------------|---------------------------------------------------------------|----------------------|-----------------|----------------------|-----------------|----------------|----|---------------------------------------------|----|------------------|----|---------------|----|---------------------------------------------------------------|
|   |            |                   |                                                               | Median               | IQR             | Median               | IQR             | Yes            | No | Yes                                         | No | Yes              | No | Yes           | No |                                                               |
| 1 | Gut Male   | 15                | Balochi:1<br>Kashmiri:1<br>Pathan:8<br>Punjabi:4<br>Saraiki:1 | 23                   | 19.50-<br>25.50 | 22.4                 | 20.50-<br>24.40 | 5              | 10 | 2                                           | 13 | 4                | 11 | 13            | 2  | Bottled: 2<br><br>Filtered: 4<br><br>Mineral: 3<br><br>Tap: 6 |
| 2 | Gut Female | 17                | Kashmiri:2<br>Pathan:2<br>Punjabi:10<br>Saraiki:2<br>Sindhi:1 | 24                   | 20-24           | 22.3                 | 21.3-<br>23.9   | 3              | 14 | 5                                           | 12 | 7                | 10 | 9             | 8  | Bottled:1<br><br>Filtered:12<br><br>Mineral:2<br><br>Tap:2    |

|   |             |    |                                                               |    |          |      |                 |   |    |   |    |   |    |    |   |                                                    |
|---|-------------|----|---------------------------------------------------------------|----|----------|------|-----------------|---|----|---|----|---|----|----|---|----------------------------------------------------|
| 3 | Oral Male   | 13 | Balochi:1<br>Kashmiri:1<br>Pathan:8<br>Punjabi:2<br>Saraiki:1 | 23 | 19-25    | 21   | 20.10-<br>24.70 | 4 | 9  | 2 | 11 | 3 | 10 | 11 | 2 | Bottled: 2<br>Filtered: 3<br>Mineral: 2<br>Tap: 6  |
| 4 | Oral Female | 15 | Kashmiri:2<br>Pathan:2<br>Punjabi:9<br>Saraiki:2              | 24 | 22-24.50 | 21.9 | 21.10-<br>23.85 | 3 | 12 | 4 | 11 | 6 | 9  | 7  | 8 | Bottled: 1<br>Filtered: 10<br>Mineral: 2<br>Tap: 2 |

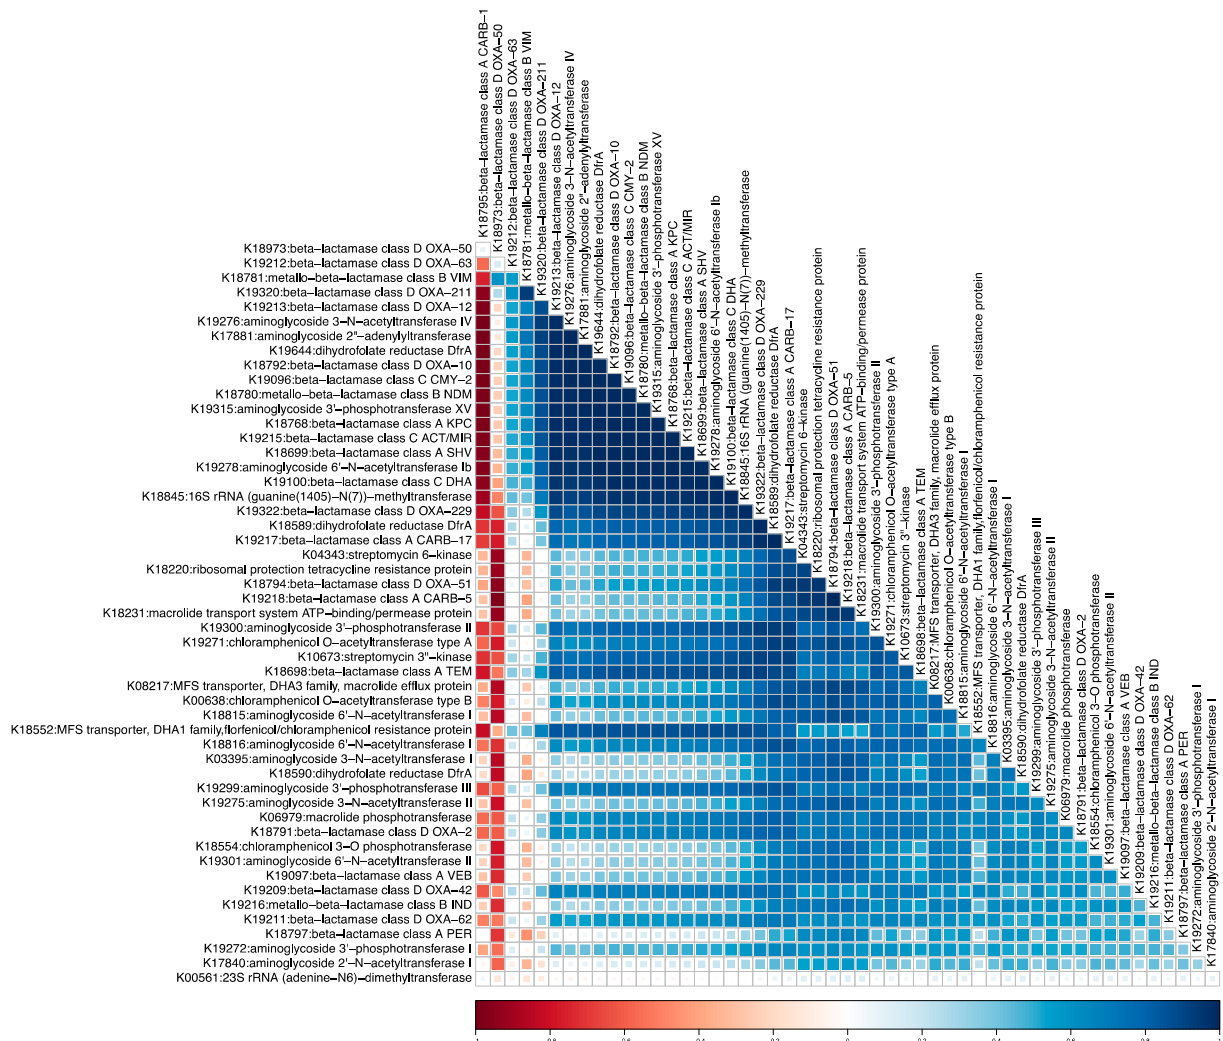

**Supplementary Figure S2.** Co-occurrence relationship between predictive antimicrobial resistance genes (piARGs) recovered from the residual covariance matrix  $\Sigma$  that are not explained by the observed covariates in the GLLVM model in Figure 5. Here, blue represent the positive correlation (increase in the abundance of piARG1 leads to an increase in the abundance of piARG2) and red represent the negative relationship (decrease in the abundance of piARG1 leads to an decrease in the abundance of piARG2).

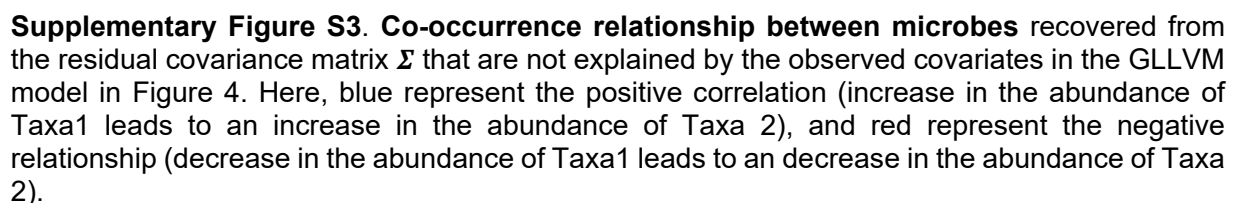

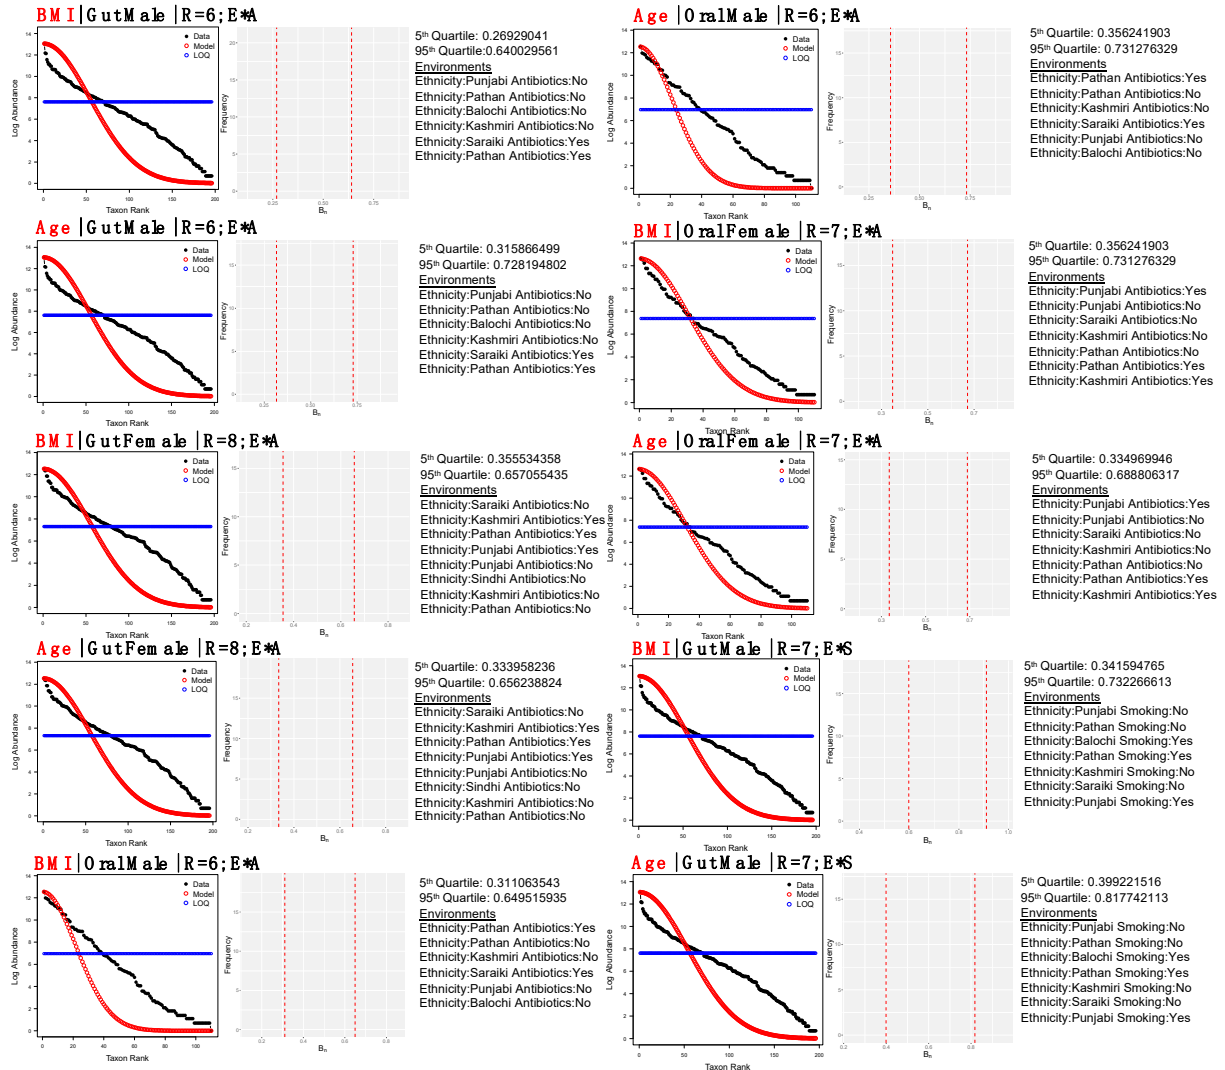

**Supplementary Figure S4.** We have applied Hurlbert's  $B_N$  to two environmental properties, Age, and BMI considered in this study depending on the expansive set of environments the microbes are observed in, e.g., “BMI | Gut Male | R = 6; E \* A” represent BMI as the environmental property and samples from the male gut with 6 environments as a combination of *Ethnicity* (E) and *Antibiotic status* (A). Similarly, E \* S represent all possible combinations of *Ethnicity* and *Smoking* status. All the analyses are given as three figure tuples. The left figures represent the rank distribution of the taxa observed in the dataset represented as black. The lognormal rank distribution model is then shown as red circles. The limit of quantification threshold, are then shown as blue circles, is 1.65 standard deviations from zero. Any taxa that fall below the limit of quantification were excluded from the analyses. The middle figure represents the null model distributions generated from applying Hurlbert's  $B_N$  calculated from 999 randomly generated taxon distributions. Red dotted lines indicate the fifth and 95th quantiles. Taxa that are high when an environmental property (Age or BMI) is low have a Hurlbert's  $B_N$  below the 5th quantile, and conversely, taxa that are high when the environmental property is high have a Hurlbert's  $B_N$  above the 95th quantile of those null models. The right figure represents the values of fifth and 95th quantiles along with the details of all possible environments.

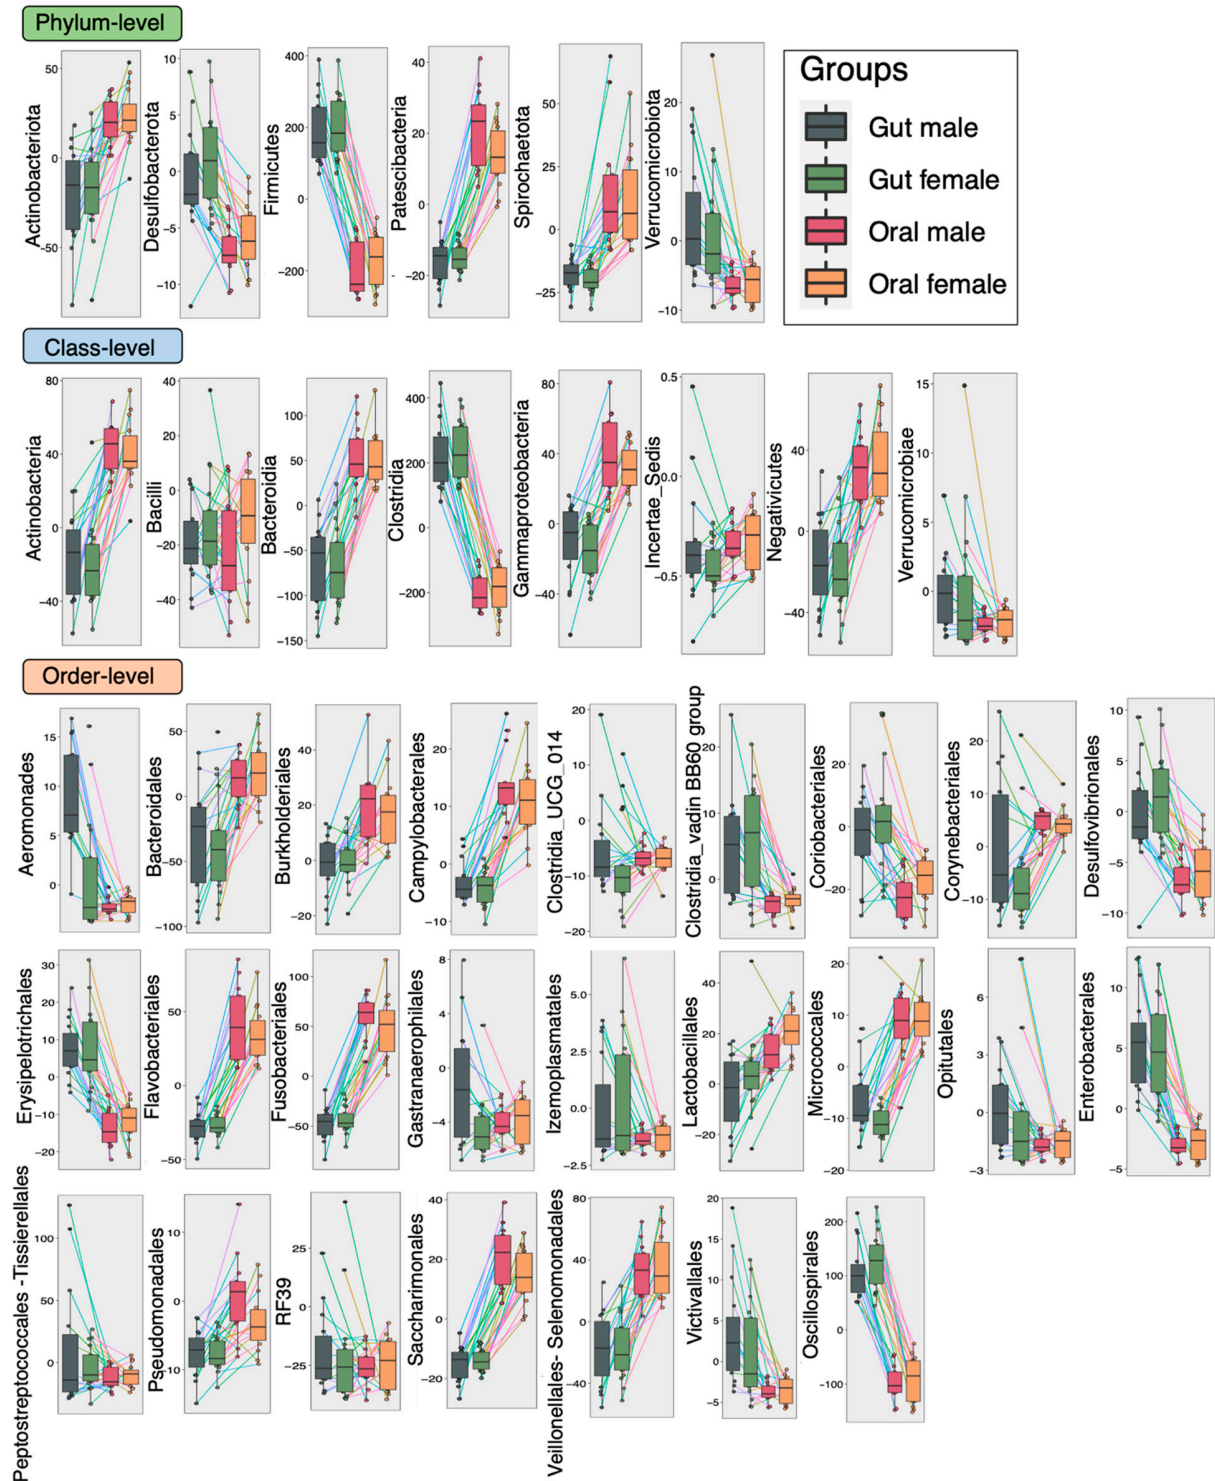

**Supplementary Figure S5. Subset of taxa (at phylum, class, and order level) that are differentially abundant between the cohorts considered in this study using QCAT-C association test that takes into account paired nature of samples i.e., originating from the same subject connected by lines. The values represent the TSS+CLR normalized abundances of individual taxa.**



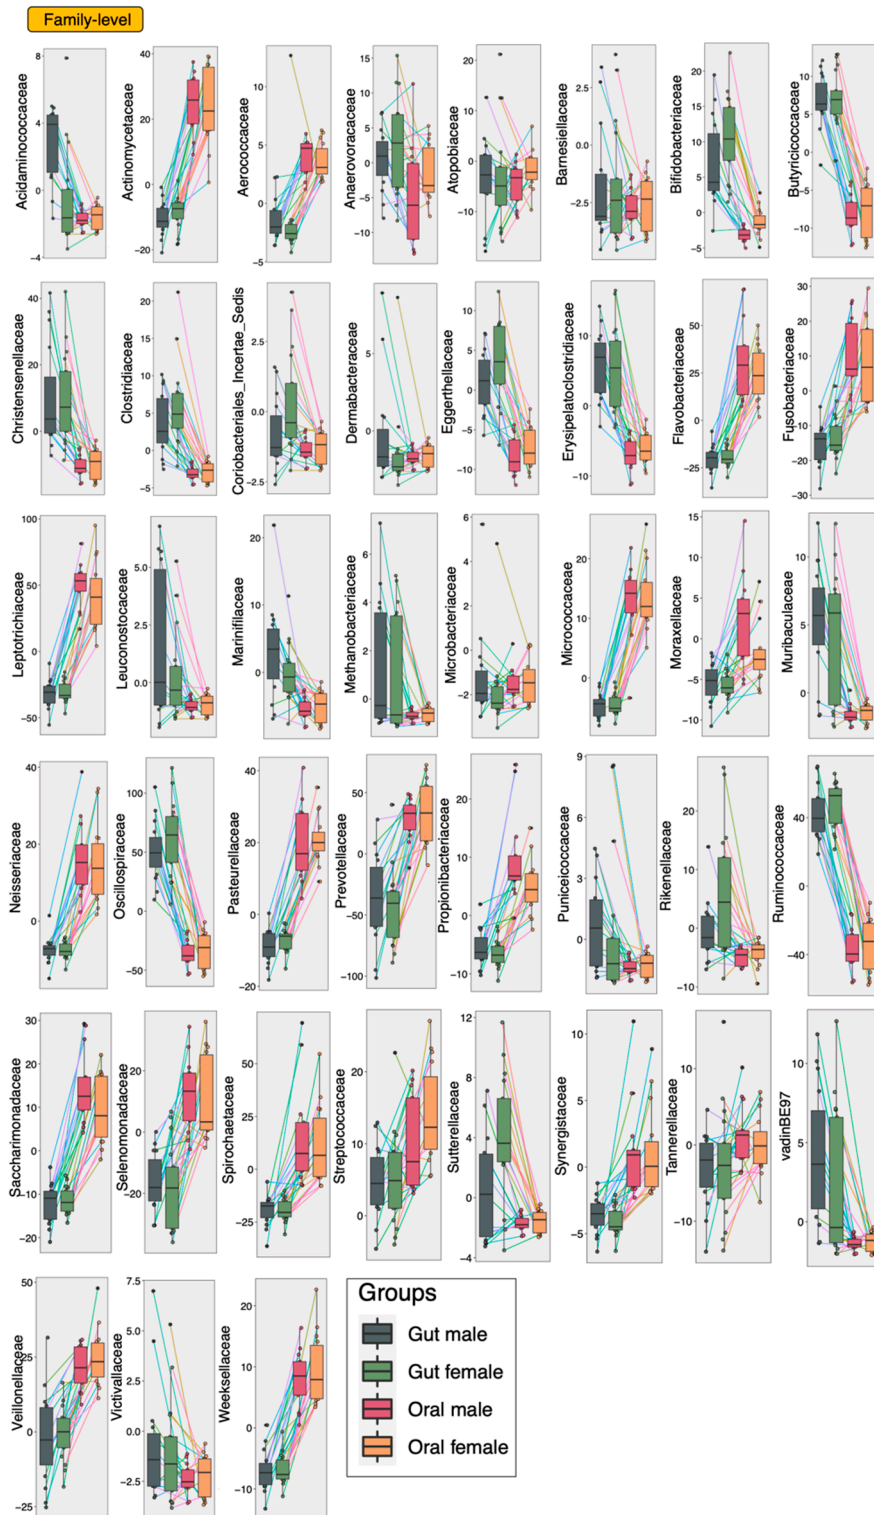

**Supplementary Figure S6. Subset of taxa (at family level)** that are differentially abundant between the cohorts considered in this study using QCAT-C association test that takes into account paired nature of samples i.e., originating from the same subject connected by lines. The values represent the TSS+CLR normalized abundances of individual taxa.



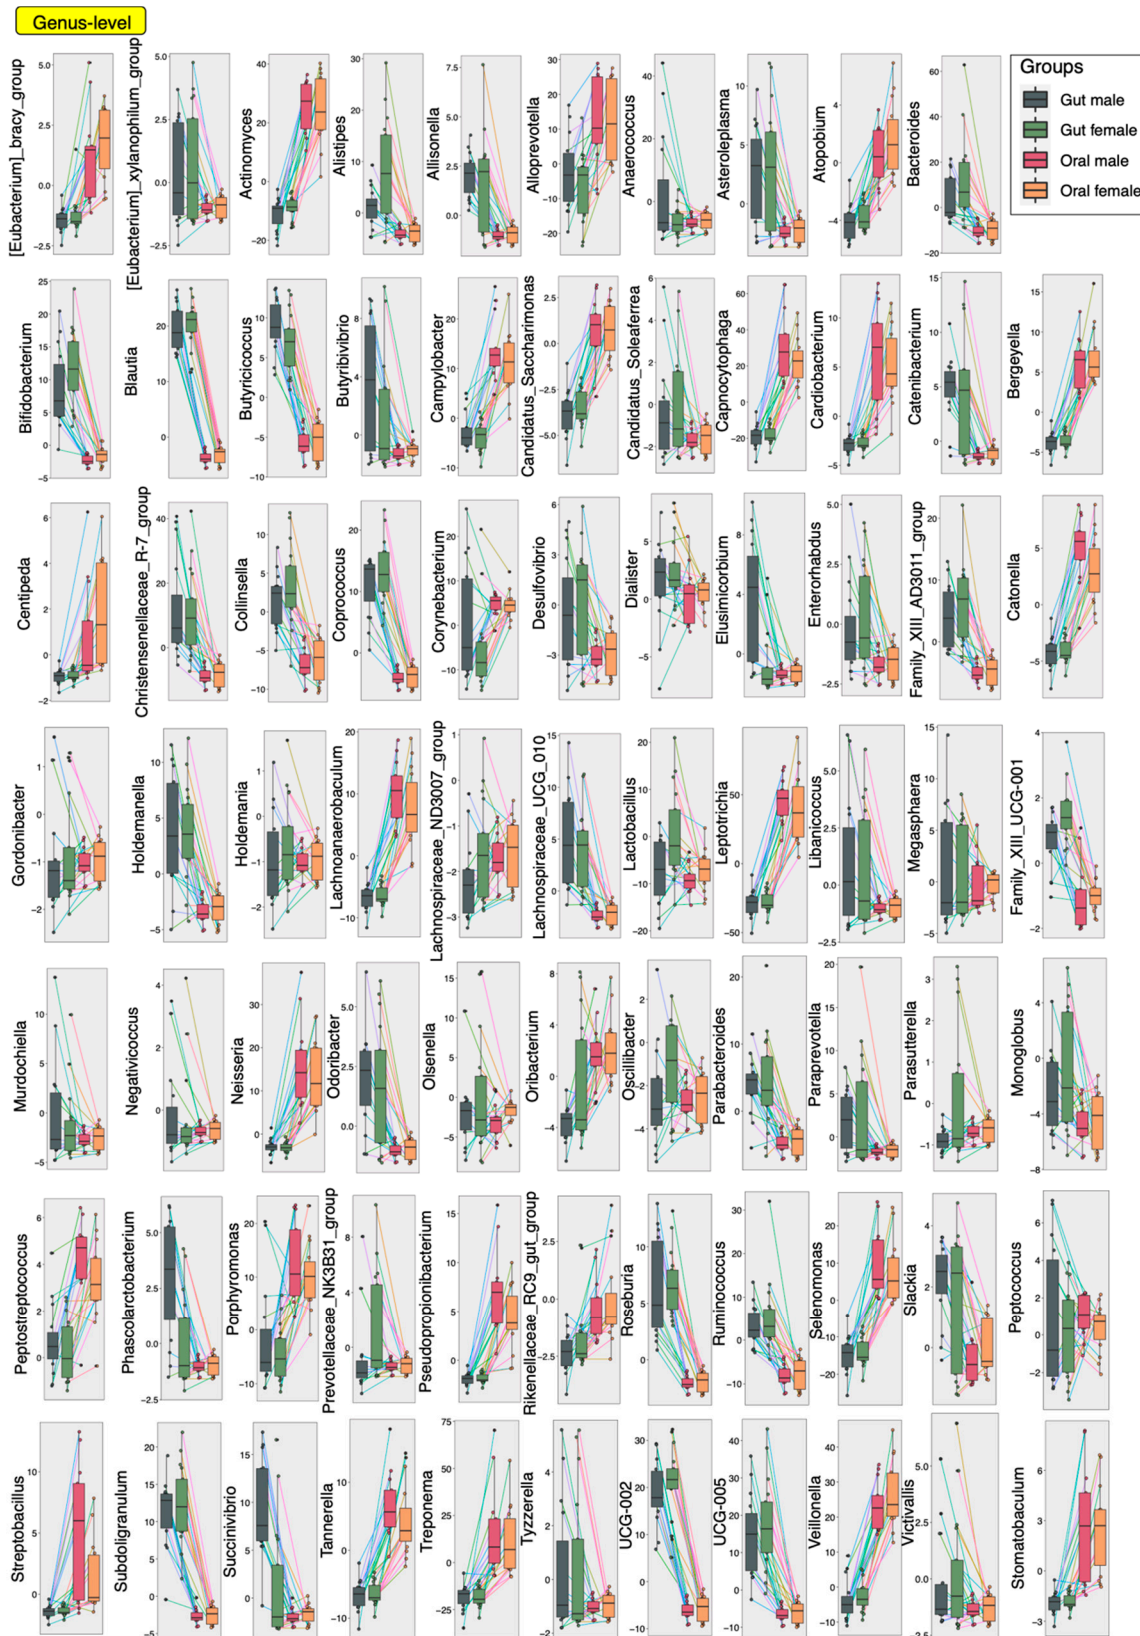

**Supplementary Figure S7. Subset of taxa (at genus level)** that are differentially abundant between the cohorts considered in this study using QCAT-C association test that takes into account paired nature of samples i.e., originating from the same subject connected by lines. The values represent the TSS+CLR normalized abundances of individual taxa.

**Supplementary Table S2. Master list of predictive antimicrobial resistance genes (piARGs)** from <https://www.genome.jp/kegg/annotation/br01600.html>. The piARGs that were detected in our study are highlighted in grey along with the annotation information.

| Sr No: | Class | KEGG Ortholog | Name                           | Threat_level          | Drug_group                                                                          |
|--------|-------|---------------|--------------------------------|-----------------------|-------------------------------------------------------------------------------------|
| 1      | A 2b  | K18698        | beta-lactamase class A TEM     | A3 B1 B4 B6 B7 B8 B12 | Extended-spectrum cephalosporin (DG01776, DG01777), Monobactam (DG01454)            |
| 2      | A 2b  | K18699        | beta-lactamase class A SHV     | B1 B4 B5              | Extended-spectrum cephalosporin (DG01776, DG01777), Monobactam (DG01454)            |
| 3      | A 2b  | K18767        | beta-lactamase class A CTX-M   | B1 B4 B7 B8 B9        | Extended-spectrum cephalosporin (DG01776, DG01777), Monobactam (DG01454)            |
| 4      | A 2b  | K18797        | beta-lactamase class A PER     | B1 B4 B6 B7 B8        | Extended-spectrum cephalosporin (DG01776, DG01777), Monobactam (DG01454)            |
| 5      | A 2b  | K19097        | beta-lactamase class A VEB     | B1 B4 B6              | Extended-spectrum cephalosporin (DG01776, DG01777)                                  |
| 6      | A 2b  | K19317        | beta-lactamase class A BEL     | B6                    | Extended-spectrum cephalosporin (DG01776, DG01777)                                  |
| 7      | A 2b  | K18796        | beta-lactamase class A LAP     |                       |                                                                                     |
| 8      | A 2f  | K18768        | beta-lactamase class A KPC     | A2 B1 B6              | Carbapenem (DG01458)                                                                |
| 9      | A 2f  | K18970        | beta-lactamase class A GES     | B1 B4 B6              | Extended-spectrum cephalosporin (DG01776, DG01777), Carbapenem (DG01458)            |
| 10     | A 2f  | K19316        | beta-lactamase class A IMI/SME | A2                    | Carbapenem (DG01458)                                                                |
| 11     | A 2f  | K22346        | beta-lactamase class A SME     | A2                    | Carbapenem (DG01458) Second-generation cephalosporin (DG01775) Monobactam (DG01454) |

|    |      |        |                                |                |                                                                                                  |
|----|------|--------|--------------------------------|----------------|--------------------------------------------------------------------------------------------------|
| 12 | A 2c | K18795 | beta-lactamase class A CARB-1  | B6 B7          | Carbenicillin (DG00519)                                                                          |
| 13 | A 2c | K19218 | beta-lactamase class A CARB-5  | B1             | Carbenicillin (DG00519)                                                                          |
| 14 | A 2c | K19217 | beta-lactamase class A CARB-17 |                |                                                                                                  |
| 15 | D 2d | K18794 | beta-lactamase class D OXA-51  | B1             | Carbapenem (DG01458)                                                                             |
| 16 | D 2d | K19318 | beta-lactamase class D OXA-213 | B1             | Carbapenem (DG01458)                                                                             |
| 17 | D 2d | K18971 | beta-lactamase class D OXA-24  | B1             | Carbapenem (DG01458)                                                                             |
| 18 | D 2d | K18793 | beta-lactamase class D OXA-23  | A2 B1          | Carbapenem (DG01458)                                                                             |
| 19 | D 2d | K19319 | beta-lactamase class D OXA-134 | B1             | Carbapenem (DG01458)                                                                             |
| 20 | D 2d | K19320 | beta-lactamase class D OXA-211 | B1             | Carbapenem (DG01458)                                                                             |
| 21 | D 2d | K19321 | beta-lactamase class D OXA-214 | B1             | Extended spectrum penicillin (DG01780)<br>Carbapenem (DG01458) (weak)                            |
| 22 | D 2d | K19322 | beta-lactamase class D OXA-229 | B1             | Carbapenem (DG01458)                                                                             |
| 23 | D 2d | K18972 | beta-lactamase class D OXA-58  | B1             | Carbapenem (DG01458)                                                                             |
| 24 | D 2d | K21266 | beta-lactamase class D OXA-286 | B1             |                                                                                                  |
| 25 | D 2d | K18973 | beta-lactamase class D OXA-50  | B6             | Narrow-spectrum penicillin (DG01779)                                                             |
| 26 | D 2d | K19211 | beta-lactamase class D OXA-62  |                | Carbapenem (DG01458)                                                                             |
| 27 | D 2d | K18791 | beta-lactamase class D OXA-2   | B1 B4 B6 B7 B8 | Extended-spectrum cephalosporin<br>(DG01776, DG01777)                                            |
| 28 | D 2d | K18792 | beta-lactamase class D OXA-10  | B1 B4 B6       | Extended-spectrum cephalosporin<br>(DG01776, DG01777)                                            |
| 29 | D 2d | K18976 | beta-lactamase class D OXA-48  | A2             | Carbapenem (DG01458)                                                                             |
| 30 | D 2d | K19210 | beta-lactamase class D OXA-61  | B2             | Narrow-spectrum penicillin (DG01779)                                                             |
| 31 | D 2d | K19212 | beta-lactamase class D OXA-63  |                | Narrow-spectrum penicillin (DG01779)                                                             |
| 32 | D 2d | K18790 | beta-lactamase class D OXA-1   | B4 B6 B7 B9    | Extended-spectrum cephalosporin<br>(DG01776, DG01777), Extended<br>spectrum penicillin (DG01780) |
| 33 | D 2d | K19098 | beta-lactamase class D OXA-9   |                | Narrow-spectrum penicillin (DG01779)                                                             |
| 34 | D 2d | K19209 | beta-lactamase class D OXA-42  |                | Narrow-spectrum penicillin (DG01779)                                                             |

|    |      |        |                                |       |                                                                                     |
|----|------|--------|--------------------------------|-------|-------------------------------------------------------------------------------------|
| 35 | D 2d | K19213 | beta-lactamase class D OXA-12  |       | Narrow-spectrum penicillin (DG01779)                                                |
| 36 | D 2d | K21276 | beta-lactamase class D OXA-22  |       | Narrow-spectrum penicillin (DG01779)                                                |
| 37 | D 2d | K21277 | beta-lactamase class D OXA-60  |       | Narrow-spectrum penicillin (DG01779), Carbapenem (DG01458) (weak)                   |
| 38 | D 2d | K22331 | beta-lactamase class D OXA-184 | B2    |                                                                                     |
| 39 | D 2d | K22332 | beta-lactamase class D OXA-548 |       |                                                                                     |
| 40 | D 2d | K22333 | beta-lactamase class D OXA-493 |       |                                                                                     |
| 41 | D 2d | K22334 | beta-lactamase class D OXA-464 |       |                                                                                     |
| 42 | D 2d | K22335 | beta-lactamase class D OXA-114 |       | Extended spectrum penicillin (DG01780), Third-generation cephalosporin (DG01776)    |
| 43 | D 2d | K22351 | beta-lactamase class D OXA-209 |       | Extended-spectrum penicillin (DG01780)                                              |
| 44 | D 2d | K22352 | beta-lactamase class D OXA-29  |       | Extended-spectrum penicillin (DG01780)                                              |
| 45 | C 1  | K19095 | beta-lactamase class C CMY-1   | B4    | Extended-spectrum cephalosporin (DG01776, DG01777)                                  |
| 46 | C 1  | K19096 | beta-lactamase class C CMY-2   | B4 B7 | Second-generation cephalosporin (DG01775), Third-generation cephalosporin (DG01776) |
| 47 | C 1  | K19100 | beta-lactamase class C DHA     |       |                                                                                     |
| 48 | C 1  | K19101 | beta-lactamase class C FOX     |       |                                                                                     |
| 49 | C 1  | K19214 | beta-lactamase class C ACC     |       |                                                                                     |
| 50 | C 1  | K19215 | beta-lactamase class C ACT/MIR |       | Extended-spectrum penicillin (DG01780), Second-generation cephalosporin (DG01775)   |
| 51 | C 1  | K20319 | beta-lactamase class C ADC     |       |                                                                                     |
| 52 | C 1  | K20320 | beta-lactamase class C PDC     |       |                                                                                     |

|    |   |        |                                              |                |                                                                                |
|----|---|--------|----------------------------------------------|----------------|--------------------------------------------------------------------------------|
| 53 | B | K18782 | metallo-beta-lactamase class B<br>IMP        | A2 B1 B4 B6 B9 | Extended-spectrum cephalosporin<br>(DG01776, DG01777), Carbapenem<br>(DG01458) |
| 54 | B | K18781 | metallo-beta-lactamase class B<br>VIM        | B4 B6          | Extended-spectrum cephalosporin<br>(DG01776, DG01777), Carbapenem<br>(DG01458) |
| 55 | B | K18780 | metallo-beta-lactamase class B<br>NDM        | A2 B1          | Carbapenem (DG01458)                                                           |
| 56 | B | K19099 | metallo-beta-lactamase class B<br>GIM        | A2 B6          | Carbapenem (DG01458)                                                           |
| 57 | B | K19216 | metallo-beta-lactamase class B<br>IND        |                | Carbapenem (DG01458)                                                           |
| 58 | O | K17840 | aminoglycoside 2'-N-<br>acetyltransferase I  | B6 B12         | Aminoglycoside (DG01447)                                                       |
| 59 | O | K03395 | aminoglycoside 3-N-<br>acetyltransferase I   | B1 B6 B7       | Aminoglycoside (DG01447)                                                       |
| 60 | O | K19275 | aminoglycoside 3-N-<br>acetyltransferase II  | B1 B7          | Aminoglycoside (DG01447)                                                       |
| 61 | O | K19276 | aminoglycoside 3-N-<br>acetyltransferase IV  | B6             | Aminoglycoside (DG01447)                                                       |
| 62 | O | K19277 | aminoglycoside 3-N-<br>acetyltransferase VI  | B7             | Aminoglycoside (DG01447)                                                       |
| 63 | O | K19278 | aminoglycoside 6'-N-<br>acetyltransferase Ib | B1 B6          | Aminoglycoside (DG01447)                                                       |
| 64 | O | K19301 | aminoglycoside 6'-N-<br>acetyltransferase II | B1 B6          | Aminoglycoside (DG01447)                                                       |
| 65 | O | K18815 | aminoglycoside 6'-N-<br>acetyltransferase I  | B1 B6 B7       | Aminoglycoside (DG01447)                                                       |
| 66 | O | K18816 | aminoglycoside 6'-N-<br>acetyltransferase I  | B1 B6 B7 B11   | Aminoglycoside (DG01447)                                                       |
| 67 | O | K17881 | aminoglycoside 2"-<br>adenylyltransferase    | B1             | Aminoglycoside (DG01447)                                                       |

|    |   |        |                                                                              |                 |                                |
|----|---|--------|------------------------------------------------------------------------------|-----------------|--------------------------------|
| 68 | O | K19544 | aminoglycoside 4'-adenylyltransferase                                        | B6              | Aminoglycoside (DG01447)       |
| 69 | O | K19272 | aminoglycoside 3'-phosphotransferase I                                       | B1 B7           | Aminoglycoside (DG01447)       |
| 70 | O | K19300 | aminoglycoside 3'-phosphotransferase II                                      | B6              | Aminoglycoside (DG01447)       |
| 71 | O | K19299 | aminoglycoside 3'-phosphotransferase III                                     | B11             | Aminoglycoside (DG01447)       |
| 72 | O | K19274 | aminoglycoside 3'-phosphotransferase VI                                      | B1              | Aminoglycoside (DG01447)       |
| 73 | O | K19315 | aminoglycoside 3'-phosphotransferase XV                                      | B6              | Aminoglycoside (DG01447)       |
| 74 | O | K10673 | streptomycin 3"-kinase                                                       | B1 B6 B7        | Aminoglycoside (DG01447)       |
| 75 | O | K04343 | streptomycin 6-kinase                                                        | B1 B6 B7        | Aminoglycoside (DG01447)       |
| 76 | O | K18845 | 16S rRNA (guanine(1405)-N(7))-methyltransferase                              | B1 B6           | Aminoglycoside (DG01447)       |
| 77 | O | K18220 | ribosomal protection tetracycline resistance protein                         | A1              | Tetracycline (DG00005)         |
| 78 | O | K00561 | 23S rRNA (adenine-N6)-dimethyl transferase                                   | B11             | Macrolide antibiotic (DG01551) |
| 79 | O | K18231 | macrolide transport system ATP-binding/permease protein                      | B1 B11          | Macrolide antibiotic (DG01551) |
| 80 | O | K06979 | macrolide phosphotransferase                                                 | B1              | Macrolide antibiotic (DG01551) |
| 81 | O | K08217 | MFS transporter, DHA3 family, macrolide efflux protein                       | B7 B11          | Macrolide antibiotic (DG01551) |
| 82 | O | K18552 | MFS transporter, DHA1 family, florfenicol/chloramphenicol resistance protein | B6 B7           | Phenicol (DG01576)             |
| 83 | O | K19271 | chloramphenicol O-acetyltransferase type A                                   | A3 B1 B6 B7 B11 | Phenicol (DG01576)             |
| 84 | O | K00638 | chloramphenicol O-acetyltransferase type B                                   | B1 B6 B7        | Phenicol (DG01576)             |

|    |   |        |                                           |          |                        |
|----|---|--------|-------------------------------------------|----------|------------------------|
| 85 | O | K18554 | chloramphenicol 3-O<br>phosphotransferase | B12      | Phenicol (DG01576)     |
| 86 | O | K18589 | dihydrofolate reductase DfrA              | B1 B6 B7 | Trimethoprim (DG01581) |
| 87 | O | K19643 | dihydrofolate reductase DfrA              | B1       | Trimethoprim (DG01581) |
| 88 | O | K18590 | dihydrofolate reductase DfrA              | B7       | Trimethoprim (DG01581) |
| 89 | O | K19644 | dihydrofolate reductase DfrA              | B7       | Trimethoprim (DG01581) |
| 90 | O | K19645 | dihydrofolate reductase DfrB              | B6 B7    | Trimethoprim (DG01581) |
